# Supplementary material
Source: PubMed Central journal article supplement (PMC3535842)
Supplement: EC.05305-11_zek999094031so1.pdf [file EC.05305-11_zek999094031so1.pdf]

### Primers used to generate point mutation constructs of Rho1

|               |                                                       |
|---------------|-------------------------------------------------------|
| Rho1-1        | CGACCTGGAGGTATTTGAGACC                                |
| Rho1-2        | CAGCTGGCATTGACGGACAGC                                 |
| Rho1-A (Q15V) | GCTCACGACCATCAGGCGAC <b>GTT</b> GCTTGTGGTAAAACATGTCTG |
| Rho1-B (Q15V) | CAGACATGTTTTACCACAAGC <b>AAC</b> GTGCGCTGATGGTCGTGAGC |
| Rho1-C (Q64L) | CATTGTGGGATACTGCTGG <b>ACTG</b> GTGCGTGGTAATTGTCGCCC  |
| Rho1-D (Q64L) | GGGCGACAATTACCACGCAC <b>CAG</b> TCCAGCAGTATCCCACAATG  |
| Rho1-3        | GTTCCGAGTATTTCTTTGACCcaggaaacagctatgaccatg            |
| Rho1-4        | catggtcatagctgttctgGGTCGAAAGAAATACTCGGAAC             |
| Rho1-5        | cactggccgtcgttttacaacTTACTTGCATCTTGCCCCAAC            |
| Rho1-6        | GTTGGGGCAAGATGCAAGTGTA <b>Ag</b> ttgtaaaacgacggccagt  |
| Rho1-7        | ACGTATGCTATGCGTGTTAGCC                                |
| Rho1-8        | GAAATTGCACCTGAGGATTGGCC                               |

### Primers used to generate $P_{CTR4}$ -RHO1

|            |                                                          |
|------------|----------------------------------------------------------|
| Pcu1       | cactggccgtcgttttacaacCGATGGTCCATATGGACCAATTGG            |
| Pcu2       | CCAATTGGTCCATATGGACCATCGgttgtaaaacgacggccagt             |
| 1-Rho1 Pcu | GCGTTGCTATTCTTCTTTGAGAGCGCC                              |
| 2-Rho1 Pcu | CACATTTAGTTCACCGTCTTCCTGACC                              |
| 3-Rho1 Pcu | GGAGGTATTTGAGACCAGAGAcaggaaacagctatgaccatg               |
| 4-Rho1 Pcu | catggtcatagctgttctgTCTCTGGTCTCAAATACCTCC                 |
| 5-Rho1 Pcu | CAACGACTTCACCAATCCATATG <b>ATGTCCGGAGAAATCAGGAGAAAGC</b> |
| 6-Rho1 Pcu | <b>GCTTTCTCCTGATTTCTCCGGACAT</b> CATATGGATTGGTGAAGTGGTTG |
| 7-Rho1 Pcu | CAGCGACGAACAAGATAAAGTACAACCTC                            |
| 8-Rho1 Pcu | GGGCCAAGGCGTGAGAATGGC                                    |
| 9-Rho1 Pcu | CGAGCATTACAGGGCATAACTAC                                  |

### Primers used to generate deletion constructs of RHO10, RHO11, CDC42 and CDC420

|          |                                              |
|----------|----------------------------------------------|
| 1-Rho10  | TGTCAGCATCGGACGATACATGGACACT                 |
| 2-Rho10  | AACTGGGTTGGAAAGATGAGCTGGAGGA                 |
| 3-Rho10  | GCTGGGACCCGAAACACCTCCAcaggaaacagctatgaccatg  |
| 4-Rho10  | catggtcatagctgttctgTGGAGGTGTTTCGGGTCCCAGC    |
| 5-Rho10  | cactggccgtcgttttacaacGGATGTTTGGGAGAAATTACGA  |
| 6-Rho10  | TCGTAATTCTCCCCAAACATCCgttgtaaaacgacggccagt   |
| 7-Rho10  | AGATGAAAGGTTTGGTACCGGGAGGCAT                 |
| 8-Rho10  | GAGACATGTTCTGCGAAGGTGATGCTGA                 |
| 9-Rho10  | CGTCTCATGGGTGCGCTGTCGT                       |
| 10-Rho10 | TGAAGGGCAGGAAGTGCCTGG                        |
| 1-Rho11  | TCCTAATCCCACCCGACCTACTTCATCG                 |
| 2-Rho11  | ATGACCGATTGACTTGGCATCTCTCCCT                 |
| 3-Rho11  | CAAGTCCCAACAATCGTGCAGTGcaggaaacagctatgaccatg |
| 4-Rho11  | catggtcatagctgttctgCACTGCACGATTGTTGGGACTTG   |

|           |                                              |
|-----------|----------------------------------------------|
| 5- Rho11  | cactggccgctgttttacaacGGCAACATCCGAGAATCGGGC   |
| 6- Rho11  | GCCCGATTCTCGGATGTTGCCgttgtaaacgacggccagtg    |
| 7- Rho11  | CTTGCAAATCACCTGTGTCAGTCACCTC                 |
| 8- Rho11  | CTACCTTTCCCGGATCCCATCATTGAGA                 |
| 9- Rho11  | CACAATTGCGTTCGCGTCAGC                        |
| 10-Rho11  | GGCGCCACGAATGGGAGCTTT                        |
| 1-Cdc42   | CGATTCATACGACAGTGACAGCAGCACA                 |
| 2-Cdc42   | CTCAGTCATCAAAGCTTCCACCCCTTCC                 |
| 3-Cdc42   | TCGGAGACGGTGCCGTTGGAAcaggaaacagctatgacctg    |
| 4-Cdc42   | catggtcatagctgtttcctgTTCCAACGGCACCGTCTCCGA   |
| 5-Cdc42   | cactggccgctgttttacaacTCCTTTTGGCTTCCCTTTGCGCA |
| 6-Cdc42   | TGGCGAAAGGGAAGCCAAAAGGAgttgtaaacgacggccagtg  |
| 7-Cdc42   | AGAGACGGAGAGCGACGATTTCAAGTCC                 |
| 8-Cdc42   | GCCCCTTCTTCTTCTCTCGTATCCACC                  |
| 9-Cdc42   | GGCGAGAGGCTCATGCGGAAT                        |
| 10-Cdc42  | CGTGGCGGCATTAGAACCCCT                        |
| 1-Cdc420  | CAGCGACGATGTTGATGAGGGTAAGCAT                 |
| 2-Cdc420  | CAACTCATCCCCATCCCCTCACCAC                    |
| 3-Cdc420  | GGGTGACGGCGCTGTTGGAAAcaggaaacagctatgacctg    |
| 4-Cdc420  | catggtcatagctgtttcctgTTTCCAACAGCGCCGTCACCC   |
| 5-Cdc420  | cactggccgctgttttacaacCCGCCAGTCGTGAAAAAGACCA  |
| 6-Cdc420  | TGGTCTTTTTTACGACTGGCGGgttgtaaacgacggccagtg   |
| 7-Cdc420  | AGTACCAAGGCCAAGAGATGGATTCCCC                 |
| 8-Cdc420  | GCAAGTCTTTTCTCTCCCATCAAGCCGA                 |
| 9-Cdc420  | ACAGTGGGGCGAACGGGACGTA                       |
| 10-Cdc420 | TGATGAGGTGAGTGGGCGTGGA                       |

Table S1. **Primers used in this study.** Upper case correspond to the gene indicated. Italics upper case refer to *CTR4* promoter. Lower case refer to invariant regions. Underlined in bold refer to nucleotide changes.

Figure S1

A.

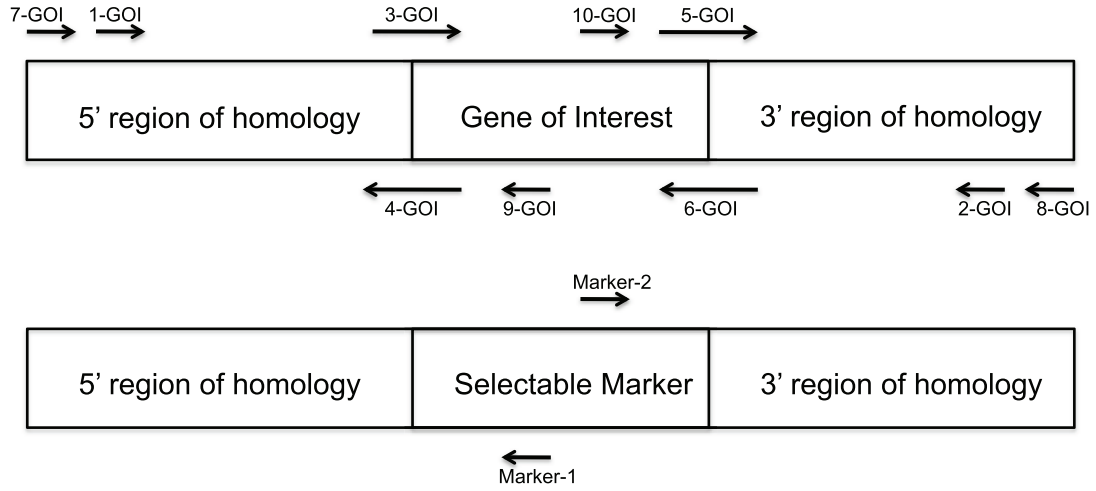

B.

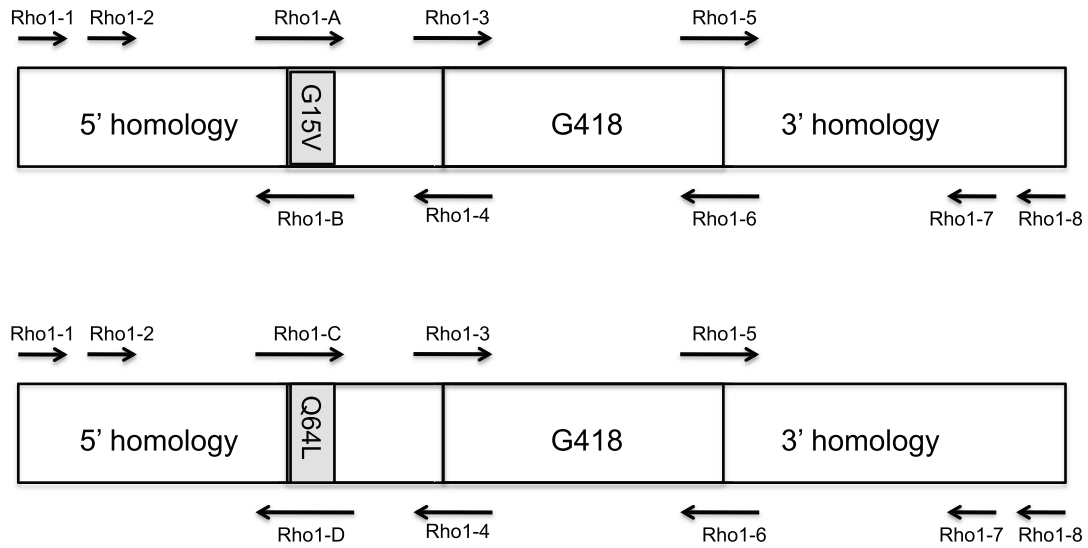

C.

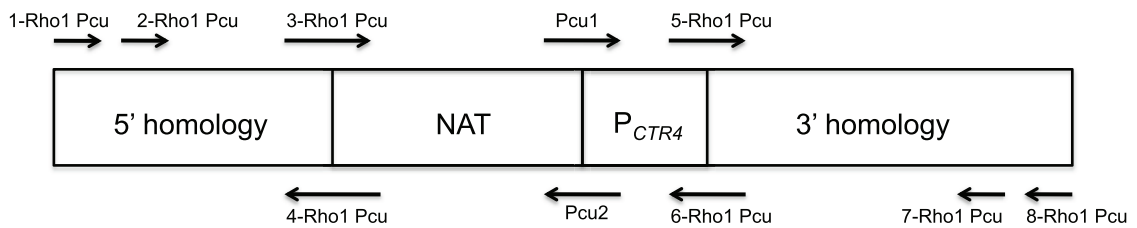

Figure S1. **Schematic diagram of gene deletion, point mutants and promoter replacement cassettes used for biolistic transformation.** Construct design and corresponding primers for generation of strains used in this study, A. gene deletions of *RHO10* and *RHO11*, and B. point mutations in *RHO1* and C. replacement of the endogenous *RHO1* promoter with  $P_{CTR4}$ .
